# Supplementary material for: The Benefits of Delay to Online Decision Making
Source: Atypon-hosted journal article supplement (doi:10.1287/mnsc.2023.00549), 2025-08-06
Supplement: mnsc.2023.00549.sm1.pdf [file mnsc.2023.00549.sm1.pdf]

## Supplementary Material

### EC.1. Proof of Lemma 1

*Proof of Lemma 1.* Recall that  $V^{\text{on}}(\mathcal{I}) = \sum_{t=1}^T r_{s_t^{\text{on}}}$ . We decompose  $\text{REG}_0 = \mathbb{E}_{\Theta} [V^{\text{off}}(\mathcal{I}, \Theta, B)] - V^{\text{on}}(\mathcal{I})$  in (3) into the regret from time period  $T$  to period  $K+2$  and the regret during the last  $K+1$  time periods:

$$\begin{aligned} & \mathbb{E}_{\Theta} \left[ V^{\text{off}}(\mathcal{I}, \Theta, B_T) - V^{\text{off}}(\mathcal{I}, (\Theta_{K+1}, \dots, \Theta_1), B_{K+1}) + V^{\text{off}}(\mathcal{I}, (\Theta_{K+1}, \dots, \Theta_1), B_{K+1}) - \sum_{t=1}^T r_{s_t^{\text{on}}} \right] \\ &= \sum_{t=K+2}^T \mathbb{E}_{(\Theta_t, \dots, \Theta_1), B_t} [V^{\text{off}}(\mathcal{I}, (\Theta_t, \dots, \Theta_1), B_t) - V^{\text{off}}(\mathcal{I}, (\Theta_{t-1}, \dots, \Theta_1), B_{t-1}) - r_{s_t^{\text{on}}}] \\ & \quad + \mathbb{E}_{(\Theta_{K+1}, \dots, \Theta_1), B_{K+1}} \left[ V^{\text{off}}(\mathcal{I}, (\Theta_{K+1}, \dots, \Theta_1), B_{K+1}) - \sum_{t=1}^{K+1} r_{s_t^{\text{on}}} \right] \\ & \leq a_{\max} \cdot M \cdot r_{\max} \cdot \sum_{t=K+2}^T \mathbb{P}(V^{\text{off}}(\mathcal{I}, (\Theta_t, \dots, \Theta_1), B_t) - V^{\text{off}}(\mathcal{I}, (\Theta_{t-1}, \dots, \Theta_1), B_{t-1}) > r_{s_t^{\text{on}}}) + \sum_{s \in S} r_s. \end{aligned}$$

In particular, the first part of the last inequality comes from the explanation right below the statement of Lemma 1, and the second part follows from the fact that

$$V^{\text{off}}(\mathcal{I}, (\Theta_{K+1}, \dots, \Theta_1), B_{K+1}) - \sum_{t=1}^{K+1} r_{s_t^{\text{on}}} \leq \sum_{s \in S} r_s. \quad (\text{EC.1})$$

To see (EC.1), note that with a  $K$ -period delay, the online policy has full knowledge of  $(\Theta_{K+1}, \dots, \Theta_1)$  so that the gap between  $V^{\text{off}}(\mathcal{I}, (\Theta_{K+1}, \dots, \Theta_1), B_{K+1})$  and  $\sum_{t=1}^{K+1} r_{s_t^{\text{on}}}$  is due to integrality. This gap has an upper bound  $\sum_{s \in S} r_s$  by rounding each variable of the optimal solution to the LP, which is independent of  $T$  and  $K$ . The proof of Lemma 1 is completed.

□

### EC.2. Proofs of Statements in the Multisecretary Problem

*Derivation of (8).* We first characterize the optimal solutions to the offline and online LP Problems (6) and (7). Because both  $B_t$  and  $D_j[t, 1]$  are integers, Problem (6) has an optimal integer solution  $\{X_{t,j}^*, X_{t,\emptyset j}^*\}_{j \in [N]}$  for each  $t$ :

$$X_{t,j}^* = \min \left\{ \left( B_t - \sum_{\ell=j+1}^N D_{\ell}[t, 1] \right)^+, D_j[t, 1] \right\} \quad \text{and} \quad X_{t,\emptyset j}^* = D_j[t, 1] - X_{t,j}^*. \quad (\text{EC.2})$$

Similarly, Problem (7) has an optimal solution  $\{X_{t,j}, X_{t,\emptyset j}\}_{j \in [N]}$ :

$$X_{t,j} = \min \left\{ \left( B_t - \sum_{\ell=j+1}^N (D_\ell[t, t-K] + \lambda_\ell[t-K-1, 1]) \right)^+, D_j[t, t-K] + \lambda_j[t-K-1, 1] \right\}, \quad (\text{EC.3})$$

$$X_{t,\emptyset j} = D_j[t, t-K] + \lambda_j[t-K-1, 1] - X_{t,j}.$$

Recall that for each  $t = T, T-1, \dots, K+2$ , the algorithm accepts the candidate with type  $\Theta_t$  at time  $t$  iff  $X_{t,\Theta_t} \geq X_{t,\emptyset\Theta_t}$ , which is equivalent to that at least half of type  $\Theta_t$  candidates are accepted in the LP solution:

$$X_{t,\Theta_t} \geq \frac{1}{2} (D_{\Theta_t}[t, t-K] + \lambda_{\Theta_t}[t-K-1, 1]). \quad (\text{EC.4})$$

Combining with (EC.3), (EC.4) is equivalent to

$$\begin{aligned} B_t &\geq \sum_{\ell=\Theta_t+1}^N (D_\ell[t, t-K] + \lambda_\ell[t-K-1, 1]) + \frac{1}{2} (D_{\Theta_t}[t, t-K] + \lambda_{\Theta_t}[t-K-1, 1]) \\ &= \left( 1 - F_{\Theta_t} + \frac{\lambda_{\Theta_t}}{2} \right) (t-K-1) + \left( \sum_{\ell=\Theta_t+1}^N D_\ell[t, t-K] + \frac{1}{2} \cdot D_{\Theta_t}[t, t-K] \right). \end{aligned}$$

Similarly, the algorithm rejects the candidate with type  $\Theta_t$  at time  $t$  iff

$$X_{t,\Theta_t} < \frac{1}{2} (D_{\Theta_t}[t, t-K] + \lambda_{\Theta_t}[t-K-1, 1]). \quad (\text{EC.5})$$

Combining with (EC.3), (EC.5) is equivalent to

$$B_t < \left( 1 - F_{\Theta_t} + \frac{\lambda_{\Theta_t}}{2} \right) (t-K-1) + \left( \sum_{\ell=\Theta_t+1}^N D_\ell[t, t-K] + \frac{1}{2} \cdot D_{\Theta_t}[t, t-K] \right).$$

The derivation of (8) is completed.  $\square$

*Proof of Theorem 1.* Combining (5) with the fact that  $a_{\max} = 1$ ,  $M = 1$ ,  $r_{\max} = r_N$ , and when the decision for  $\Theta_t$  incurs regret is exactly when incorrect acceptance or rejection occurs, the regret REG of Algorithm 1 can be upper bounded by

$$r_N \cdot \sum_{t=K+2}^T \mathbb{P}(V^{\text{off}}(\mathcal{I}, (\Theta_t, \dots, \Theta_1), B_t) - V^{\text{off}}(\mathcal{I}, (\Theta_{t-1}, \dots, \Theta_1), B_{t-1}) > r_{s_t^{\text{on}}}). \quad (\text{EC.6})$$

Note that the probability in (EC.6) is w.r.t.  $(\Theta_{t-1}, \dots, \Theta_1)$  and  $B_t$ . It is straightforward to verify that incorrect acceptance for  $\Theta_t$  occurs iff  $X_{t, \Theta_t}^* = 0$  and (8) holds, and incorrect rejection for  $\Theta_t$  occurs iff  $X_{t, \emptyset_{\Theta_t}}^* = 0$  and the reverse of (8) holds. From (EC.2),

$$\begin{aligned} X_{t, \Theta_t}^* = 0 &\iff \sum_{\ell=\Theta_t+1}^N D_\ell[t, 1] \geq B_t, \\ X_{t, \emptyset_{\Theta_t}}^* = 0 &\iff \sum_{\ell=\Theta_t}^N D_\ell[t, 1] \leq B_t. \end{aligned} \tag{EC.7}$$

Combining (EC.7) and (8), it follows that incorrect acceptance implies

$$\sum_{\ell=\Theta_t+1}^N D_\ell[t-K-1, 1] - (1 - F_{\Theta_t})(t-K-1) \geq \frac{\lambda_{\Theta_t}}{2} \cdot (t-K-1) + \frac{1}{2} \cdot D_{\Theta_t}[t, t-K],$$

and incorrect rejection implies

$$(1 - F_{\Theta_t} + \lambda_{\Theta_t})(t-K-1) - \sum_{\ell=\Theta_t}^N D_\ell[t-K-1, 1] \geq \frac{\lambda_{\Theta_t}}{2} \cdot (t-K-1) + \frac{1}{2} \cdot D_{\Theta_t}[t, t-K].$$

Hence, conditional on  $(\Theta_t, \dots, \Theta_{t-K})$ , the probability of incorrect acceptance for  $\Theta_t$  is at most

$$\mathbb{P} \left( \sum_{\ell=\Theta_t+1}^N D_\ell[t-K-1, 1] - (1 - F_{\Theta_t})(t-K-1) \geq \frac{\lambda_{\Theta_t}}{2} \cdot (t-K-1) + \frac{1}{2} \cdot D_{\Theta_t}[t, t-K] \right), \tag{EC.8}$$

and the probability of incorrect rejection for  $\Theta_t$  is at most

$$\mathbb{P} \left( (1 - F_{\Theta_t} + \lambda_{\Theta_t})(t-K-1) - \sum_{\ell=\Theta_t}^N D_\ell[t-K-1, 1] \geq \frac{\lambda_{\Theta_t}}{2} \cdot (t-K-1) + \frac{1}{2} \cdot D_{\Theta_t}[t, t-K] \right). \tag{EC.9}$$

Furthermore, from Hoeffding's inequality, both (EC.8) and (EC.9) can be upper bounded by

$$\exp \left( -\frac{t-K-1}{2} \cdot \left( \lambda_{\Theta_t} + \frac{D_{\Theta_t}[t, t-K]}{t-K-1} \right)^2 \right). \tag{EC.10}$$

Note that  $B_t$  is the only state variable in the multisecretary problem and the upper bound (EC.10) holds for any value of  $B_t$ . Thus, conditional on  $\Theta_t$ , it follows that

$$\begin{aligned} &\mathbb{P} (V^{\text{off}}(\mathcal{I}, (\Theta_t, \dots, \Theta_1), B_t) - V^{\text{off}}(\mathcal{I}, (\Theta_{t-1}, \dots, \Theta_1), B_{t-1}) > r_{s_t^{\text{on}}}) \\ &\leq \mathbb{E} \left[ \exp \left( -\frac{t-K-1}{2} \cdot \left( \lambda_{\Theta_t} + \frac{D_{\Theta_t}[t, t-K]}{t-K-1} \right)^2 \right) \middle| \Theta_t \right], \end{aligned} \tag{EC.11}$$

where the probability and expectation above are w.r.t.  $(\Theta_{t-1}, \dots, \Theta_{t-K})$ . Furthermore,

$$\begin{aligned}
& \mathbb{E} \left[ \exp \left( -\frac{t-K-1}{2} \cdot \left( \lambda_{\Theta_t} + \frac{D_{\Theta_t}[t, t-K]}{t-K-1} \right)^2 \right) \middle| \Theta_t \right] \\
&= \exp \left( -\frac{\lambda_{\Theta_t}^2}{2} \cdot (t-K-1) \right) \cdot \mathbb{E} \left[ \exp(-\lambda_{\Theta_t} \cdot D_{\Theta_t}[t, t-K]) \cdot \exp \left( -\frac{(D_{\Theta_t}[t, t-K])^2}{2(t-K-1)} \right) \middle| \Theta_t \right] \\
&\leq \exp \left( -\frac{\lambda_{\Theta_t}^2}{2} \cdot (t-K-1) \right) \cdot \mathbb{E} [\exp(-\lambda_{\Theta_t} \cdot D_{\Theta_t}[t, t-K]) | \Theta_t] \\
&= \exp \left( -\frac{\lambda_{\Theta_t}^2}{2} \cdot (t-K-1) \right) \cdot e^{-\lambda_{\Theta_t}} \cdot \mathbb{E} [\exp(-\lambda_{\Theta_t} \cdot D_{\Theta_t}[t-1, t-K]) | \Theta_t] \tag{EC.12} \\
&= \exp \left( -\frac{\lambda_{\Theta_t}^2}{2} \cdot (t-K-1) \right) \cdot e^{-\lambda_{\Theta_t}} \cdot (\lambda_{\Theta_t} e^{-\lambda_{\Theta_t}} + (1 - \lambda_{\Theta_t}))^K, \tag{EC.13}
\end{aligned}$$

where the inequality comes from the fact that the term  $\exp \left( -\frac{(D_{\Theta_t}[t, t-K])^2}{2(t-K-1)} \right)$  is no greater than one and (EC.12) is from the fact that  $D_{\Theta_t}[t, t] = 1$  conditional on  $\Theta_t$ .

Recall that  $\lambda_{\min} = \min_{j \in [N]} \lambda_j$  and  $\rho_0 = \lambda_{\min} e^{-\lambda_{\min}} + (1 - \lambda_{\min}) < 1$ . Note that the function  $g(x) \triangleq x e^{-x} + (1 - x)$  is non-increasing in  $x$  on  $[0, 1]$ . Hence, combining (EC.6), (EC.11), and (EC.13), the expected regret is no greater than

$$\begin{aligned}
& r_N \cdot \sum_{t=K+2}^T \sum_{j \in [N]} \lambda_j \left( e^{-\lambda_j} \cdot \exp \left( -\frac{\lambda_j^2}{2} \cdot (t-K-1) \right) \cdot (\lambda_j e^{-\lambda_j} + (1 - \lambda_j))^K \right) \\
&\leq r_N \cdot \sum_{t=K+2}^T \sum_{j \in [N]} \lambda_j \left( e^{-\lambda_{\min}} \cdot \exp \left( -\frac{\lambda_{\min}^2}{2} \cdot (t-K-1) \right) \cdot (\lambda_{\min} e^{-\lambda_{\min}} + (1 - \lambda_{\min}))^K \right) \\
&= r_N \cdot e^{-\lambda_{\min}} \cdot \rho_0^K \cdot \sum_{t=K+2}^T \exp \left( -\frac{\lambda_{\min}^2}{2} \cdot (t-K-1) \right) \\
&\leq r_N \cdot e^{-\lambda_{\min}} \cdot \rho_0^K \cdot \sum_{t=1}^{\infty} \exp \left( -\frac{\lambda_{\min}^2 t}{2} \right) \\
&\leq r_N \cdot e^{-\lambda_{\min}} \cdot \rho_0^K \cdot \frac{\exp(-\lambda_{\min}^2/2)}{1 - \exp(-\lambda_{\min}^2/2)} \\
&= r_N \cdot e^{-\lambda_{\min}} \cdot \rho_0^K \cdot \frac{1}{\exp(\lambda_{\min}^2/2) - 1} \\
&\leq \rho_0^K \cdot \frac{2 \cdot r_N \cdot e^{-\lambda_{\min}}}{\lambda_{\min}^2},
\end{aligned}$$

where the last inequality comes from the fact that  $e^x \geq 1 + x$  for  $x \geq 0$ . The proof of Theorem 1 is completed.  $\square$

### EC.3. Proofs of Statements in the General Online Resource Allocation Problem

*Proof of Theorem 2.* We first prove that  $X_{t,s_t^{\text{on}}}^* < a_{\max} + 1$  is a necessary condition for

$$V^{\text{off}}(\mathcal{I}, (\Theta_t, \dots, \Theta_1), B_t) - V^{\text{off}}(\mathcal{I}, (\Theta_{t-1}, \dots, \Theta_1), B_{t-1}) > r_{s_t^{\text{on}}}.$$

Indeed, if  $X_{t,s_t^{\text{on}}}^* \geq a_{\max} + 1$ , then  $B_{t,i}$  for each resource  $i \in [M]$  satisfying  $a_{i s_t^{\text{on}}} > 0$  is at least  $(a_{\max} + 1)a_{i s_t^{\text{on}}}$ . This implies that the remaining resource after action  $s_t^{\text{on}}$  is at least  $a_{\max} \cdot a_{i s_t^{\text{on}}} \geq a_{\max}$ , because  $a_{\min}$  is normalized to be 1. Thus, action  $s_t^{\text{on}}$  does not result in an update of feasible action sets. That is,  $S^t = S^{t-1}$ , and  $V^{\text{off}}(\mathcal{I}, (\Theta_t, \dots, \Theta_1), B_t)$  and  $V^{\text{off}}(\mathcal{I}, (\Theta_{t-1}, \dots, \Theta_1), B_{t-1})$  have the same coefficient matrix. From this, we prove that  $V^{\text{off}}(\mathcal{I}, (\Theta_t, \dots, \Theta_1), B_t) = V^{\text{off}}(\mathcal{I}, (\Theta_{t-1}, \dots, \Theta_1), B_{t-1}) + r_{s_t^{\text{on}}}$ . More specifically, for any given sample path  $\Theta$ , we define  $\omega_{t,s}^{\text{on}}$  as the indicator of whether action  $s \in S_j$  is chosen for arrival  $\Theta_t$  with customer type  $j$ , namely,  $\omega_{t,s}^{\text{on}} = \mathbb{I}\{\Theta_t = j, s_t^{\text{on}} = s\}$ . Let us consider the following variant of the offline Problem (19):

$$\begin{aligned} \max \quad & \sum_{s \in S_t} r_s x_s & \text{(EC.14)} \\ \text{s.t.} \quad & \sum_{s \in S_t} a_{i s} x_s \leq B_{t,i}, & \forall i \in [M], \\ & \sum_{s \in S_{t,j}} x_s = D_j[t, 1], & \forall j \in [N], \\ & x_s \geq \omega_s, & \forall s \in S_t. \end{aligned}$$

Let  $\hat{V}^{\text{off}}(\mathcal{I}, (\Theta_t, \dots, \Theta_1), B_t, \{\omega_s\})$  denote the optimal value of Problem (EC.14) with right-hand side vector  $B_t$ ,  $\{D_j[t, 1]\}$ , and  $\{\omega_s\}$ . It is easy to see that the optimal value of the offline LP Problem (19) is  $\hat{V}^{\text{off}}(\mathcal{I}, (\Theta_t, \dots, \Theta_1), B_t, 0) = V^{\text{off}}(\mathcal{I}, (\Theta_t, \dots, \Theta_1), B_t)$ . After action  $s_t^{\text{on}}$  is chosen for  $\Theta_t$ , the optimal value that can be obtained afterwards reduces to  $\hat{V}^{\text{off}}(\mathcal{I}, (\Theta_t, \dots, \Theta_1), B_t, \{\omega_{t,s}^{\text{on}}\})$ . Note that  $\hat{V}^{\text{off}}(\mathcal{I}, (\Theta_t, \dots, \Theta_1), B_t, \{\omega_{t,s}^{\text{on}}\}) = V^{\text{off}}(\mathcal{I}, (\Theta_{t-1}, \dots, \Theta_1), B_{t-1}) + r_{s_t^{\text{on}}}$ , because  $S^t = S^{t-1}$ . Thus, for any given  $t$ , the regret of the decision  $s_t^{\text{on}}$  for  $\Theta_t$  is

$$\begin{aligned} \text{Diff} &\triangleq \hat{V}^{\text{off}}(\mathcal{I}, (\Theta_t, \dots, \Theta_1), B_t, 0) - \hat{V}^{\text{off}}(\mathcal{I}, (\Theta_t, \dots, \Theta_1), B_t, \{\omega_{t,s}^{\text{on}}\}) \\ &= V^{\text{off}}(\mathcal{I}, (\Theta_t, \dots, \Theta_1), B_t) - (V^{\text{off}}(\mathcal{I}, (\Theta_{t-1}, \dots, \Theta_1), B_{t-1}) + r_{s_t^{\text{on}}}). \end{aligned}$$

Furthermore, for an optimal solution  $\{X_{t,s}^*\}_{s \in S_t}$  of Problem (19), because  $X_{t,s_t^{\text{on}}}^* \geq a_{\max} + 1 \geq 1$ , we have that  $\{X_{t,s}^*\}_{s \in S_t}$  is a feasible solution of Problem (EC.14) with  $\omega_s = \omega_{t,s}^{\text{on}}$ , implying  $\text{Diff} = 0$ . Therefore, if  $\text{Diff} > 0$ , then we must have  $X_{t,s_t^{\text{on}}}^* < a_{\max} + 1$ .

Plugging this fact into (5), we have

$$\begin{aligned} \text{REG} &\leq a_{\max} \cdot M \cdot r_{\max} \cdot \sum_{t=K+2}^T \mathbb{P} \left( X_{t,s_t^{\text{on}}}^* < a_{\max} + 1 \right) \\ &= a_{\max} \cdot M \cdot r_{\max} \cdot \sum_{t=K+2}^T \sum_{j \in [N]} \lambda_j \cdot \mathbb{P} \left( X_{t,s_t^{\text{on}}}^* < a_{\max} + 1 \mid \Theta_t = j \right). \end{aligned} \quad (\text{EC.15})$$

Recall that  $C_1 = (a_{\max} + 1)C_{\max} + a_{\max}$ . We next bound  $\mathbb{P} \left( X_{t,s_t^{\text{on}}}^* < a_{\max} + 1 \mid \Theta_t = j \right)$ :

$$\begin{aligned} &\mathbb{P} \left( X_{t,s_t^{\text{on}}}^* < a_{\max} + 1 \mid \Theta_t = j \right) \\ &\leq \mathbb{P} \left( X_{t,s_t^{\text{on}}}^* < a_{\max} + 1 + X_{t,s_t^{\text{on}}} - \frac{D_j[t, t-K] + \lambda_j(t-K-1)}{C_{\max} + 1} \mid \Theta_t = j \right) \\ &\leq \mathbb{P} \left( \max_{s \in S_t} |X_{t,s}^* - X_{t,s}| > \frac{D_j[t, t-K] + \lambda_j(t-K-1)}{C_{\max} + 1} - (a_{\max} + 1) \mid \Theta_t = j \right) \\ &\leq \mathbb{P} \left( \max_{j \in [N]} |D_j[t-K-1, 1] - \lambda_j(t-K-1)| > \frac{D_j[t-1, t-K] + \lambda_j(t-K-1) - C_1}{\kappa_t(C_{\max} + 1)} \mid \Theta_t = j \right) \\ &\leq \mathbb{P} \left( |D_{j_t^*}[t-K-1, 1] - \lambda_{j_t^*}(t-K-1)| > \frac{D_j[t-1, t-K] + \lambda_j(t-K-1) - C_1}{\kappa_{\max}(C_{\max} + 1)} \mid \Theta_t = j \right) \\ &\triangleq \mathbb{P} (E_t^j). \end{aligned} \quad (\text{EC.16})$$

Here,  $\kappa_t = \kappa(J_t)$ ,  $j_t^* \in \arg \max_{j \in [N]} \{|D_j[t-K-1, 1] - \lambda_j(t-K-1)|\}$ , and  $E_t^j$  represents the following event conditional on  $\Theta_t = j$ :

$$\left| D_{j_t^*}[t-K-1, 1] - \lambda_{j_t^*}(t-K-1) \right| > \frac{D_j[t-1, t-K] + \lambda_j(t-K-1) - C_1}{\kappa_{\max}(C_{\max} + 1)}.$$

In addition, the first inequality comes from (21), the third inequality comes from (22), and the fourth inequality is due to the monotonicity of  $\kappa_t$  in  $t$ .

Note that (EC.16) is independent of  $B_t$ . Conditional on  $(\Theta_{t-1}, \dots, \Theta_{t-K})$ , we further decompose  $\mathbb{P} (E_t^j \mid \Theta_{t-1}, \dots, \Theta_{t-K})$  into two parts:

$$\mathbb{P} (E_t^j \mid \Theta_{t-1}, \dots, \Theta_{t-K}) = A_t^{j,1} + A_t^{j,2}, \quad (\text{EC.17})$$

where

$$\begin{aligned} A_t^{j,1} &\triangleq \mathbb{I}(D_j[t-1, t-K] + \lambda_j(t-K-1) - C_1 < 0) \\ &\quad \cdot \mathbb{P}\left(E_t^j \mid D_j[t-1, t-K] + \lambda_j(t-K-1) - C_1 < 0\right), \\ A_t^{j,2} &\triangleq \mathbb{I}(D_j[t-1, t-K] + \lambda_j(t-K-1) - C_1 \geq 0) \\ &\quad \cdot \mathbb{P}\left(E_t^j \mid D_j[t-1, t-K] + \lambda_j(t-K-1) - C_1 \geq 0\right). \end{aligned}$$

It is easy to see that  $\mathbb{P}\left(E_t^j \mid D_j[t-1, t-K] + \lambda_j(t-K-1) - C_1 < 0\right) = 1$ . It implies that

$$\begin{aligned} &\sum_{t=K+2}^T \mathbb{E}[A_t^{j,1}] \\ &= \sum_{t=K+2}^T \mathbb{E}\left[\mathbb{I}(D_j[t-1, t-K] + \lambda_j(t-K-1) - C_1 < 0) \right. \\ &\quad \left. \cdot \mathbb{P}\left(E_t^j \mid D_j[t-1, t-K] + \lambda_j(t-K-1) - C_1 < 0\right)\right] \\ &= \sum_{t=K+2}^T \mathbb{P}(D_j[t-1, t-K] + \lambda_j(t-K-1) - C_1 < 0) \cdot 1, \\ &= \sum_{m=1}^{T-K-1} \mathbb{P}(\text{Bin}(K, \lambda_j) < C_1 - \lambda_j m), \end{aligned}$$

where the expectation above is w.r.t.  $(\Theta_{t-1}, \dots, \Theta_{t-K})$ , and the last equality holds because  $D_j[t-1, t-K]$  follows a binomial distribution with parameters  $K$  and  $\lambda_j$  (denoted by  $\text{Bin}(K, \lambda_j)$ ). It is straightforward to see that

$$\begin{aligned} \sum_{m=1}^{T-K-1} \mathbb{P}(\text{Bin}(K, \lambda_j) < C_1 - \lambda_j m) &\leq \left\lceil \frac{C_1}{\lambda_j} \right\rceil \cdot \mathbb{P}(\text{Bin}(K, \lambda_j) \leq C_1) \\ &\leq \left\lceil \frac{C_1}{\lambda_{\min}} \right\rceil \cdot \mathbb{P}(\text{Bin}(K, \lambda_j) \leq C_1). \end{aligned} \tag{EC.18}$$

For  $K > \frac{C_1}{\lambda_{\min}}$ , Hoeffding's inequality can yield the following upper bound on  $\mathbb{P}(\text{Bin}(K, \lambda_j) \leq C_1)$ :

$$\begin{aligned} \mathbb{P}(\text{Bin}(K, \lambda_j) \leq C_1) &\leq \exp\left(-2K \left(\lambda_j - \frac{C_1}{K}\right)^2\right) \\ &\leq \exp\left(-2K \left(\lambda_{\min} - \frac{C_1}{K}\right)^2\right) \\ &= \exp\left(-2K\lambda_{\min}^2 + 4\lambda_{\min}C_1 - 2\frac{C_1^2}{K}\right) \end{aligned}$$

$$\leq \exp\left(-2\lambda_{\min}^2\left(K - 2\frac{C_1}{\lambda_{\min}}\right)\right).$$

In addition,  $\mathbb{P}(\text{Bin}(K, \lambda_j) \leq C_1)$  has a trivial upper bound 1 for  $0 \leq K \leq \frac{C_1}{\lambda_{\min}}$ . Thus, for all  $K \geq 0$ , we have

$$\mathbb{P}(\text{Bin}(K, \lambda_j) \leq C_1) \leq \left(\exp(-2\lambda_{\min}^2)\right)^{K-2\frac{C_1}{\lambda_{\min}}} = \rho_1^{K-2\frac{C_1}{\lambda_{\min}}}, \quad (\text{EC.19})$$

where  $\rho_1 = \exp(-2\lambda_{\min}^2)$ . It implies that

$$\sum_{t=K+2}^T \mathbb{E}[A_t^{j,1}] \leq \left\lceil \frac{C_1}{\lambda_{\min}} \right\rceil \cdot \rho_1^{K-2\frac{C_1}{\lambda_{\min}}}. \quad (\text{EC.20})$$

Next, we bound  $\sum_{t=K+2}^T \mathbb{E}[A_t^{j,2}]$  from above. From Hoeffding's inequality, for all  $t \geq K+2$ , we have

$$\begin{aligned} & \mathbb{P}\left(E_t^j \mid D_j[t-1, t-K] + \lambda_j(t-K-1) - C_1 \geq 0\right) \\ & \leq 2 \exp\left(-2\frac{(D_j[t-1, t-K] + \lambda_j(t-K-1) - C_1)^2}{(t-K-1) \cdot \kappa_{\max}^2 \cdot (C_{\max} + 1)^2}\right), \end{aligned}$$

which follows that

$$\begin{aligned} & \sum_{t=K+2}^T \mathbb{E}[A_t^{j,2}] \\ & \leq \sum_{t=K+2}^T \mathbb{E}\left[\mathbb{I}(D_j[t-1, t-K] + \lambda_j(t-K-1) \geq C_1)\right. \\ & \quad \left. \cdot 2 \exp\left(-2\frac{(D_j[t-1, t-K] + \lambda_j(t-K-1) - C_1)^2}{(t-K-1) \cdot \kappa_{\max}^2 \cdot (C_{\max} + 1)^2}\right)\right] \\ & \leq 2 \sum_{t=K+2}^T \mathbb{E}\left[\exp\left(-2\frac{(\lambda_j(t-K-1) + (D_j[t-1, t-K] - C_1))^2}{(t-K-1) \cdot \kappa_{\max}^2 \cdot (C_{\max} + 1)^2}\right)\right]. \end{aligned}$$

In addition,

$$\begin{aligned} & \mathbb{E}\left[\exp\left(-2\frac{(\lambda_j(t-K-1) + (D_j[t-1, t-K] - C_1))^2}{(t-K-1) \cdot \kappa_{\max}^2 \cdot (C_{\max} + 1)^2}\right)\right] \\ & = \exp\left(-\frac{2\lambda_j^2(t-K-1)}{\kappa_{\max}^2 \cdot (C_{\max} + 1)^2}\right) \mathbb{E}\left[\exp\left(-\frac{4\lambda_j(D_j[t-1, t-K] - C_1)}{\kappa_{\max}^2 \cdot (C_{\max} + 1)^2}\right)\right. \\ & \quad \left. \cdot \exp\left(-\frac{2(D_j[t-1, t-K] - C_1)^2}{(t-K-1) \cdot \kappa_{\max}^2 \cdot (C_{\max} + 1)^2}\right)\right] \end{aligned}$$

$$\begin{aligned}
&\leq \exp\left(-\frac{2\lambda_j^2(t-K-1)}{\kappa_{\max}^2 \cdot (C_{\max}+1)^2}\right) \mathbb{E}\left[\exp\left(-\frac{4\lambda_j(D_j[t-1, t-K]-C_1)}{\kappa_{\max}^2 \cdot (C_{\max}+1)^2}\right)\right] \\
&= \exp\left(-\frac{2\lambda_j^2(t-K-1)}{\kappa_{\max}^2 \cdot (C_{\max}+1)^2}\right) \exp\left(\frac{4\lambda_j \cdot C_1}{\kappa_{\max}^2 \cdot (C_{\max}+1)^2}\right) \left(\lambda_j \exp\left(-\frac{4\lambda_j}{\kappa_{\max}^2 \cdot (C_{\max}+1)^2}\right) + (1-\lambda_j)\right)^K \\
&\leq \exp\left(-\frac{2\lambda_{\min}^2(t-K-1)}{\kappa_{\max}^2 \cdot (C_{\max}+1)^2}\right) \exp\left(\frac{4\lambda_{\max} \cdot C_1}{\kappa_{\max}^2 \cdot (C_{\max}+1)^2}\right) \rho_2^K, \tag{EC.21}
\end{aligned}$$

where  $\rho_2 = \lambda_{\min} \exp\left(-\frac{4\lambda_{\min}}{\kappa_{\max}^2(C_{\max}+1)^2}\right) + (1-\lambda_{\min})$  and the last inequality comes from the fact that the function  $f(x) \triangleq x \exp\left(-\frac{4x}{\kappa_{\max}^2(C_{\max}+1)^2}\right) + (1-x)$  is non-increasing in  $x \in [0, 1]$ .

Thus,

$$\begin{aligned}
\sum_{t=K+2}^T \mathbb{E}[A_t^{j,2}] &\leq 2 \sum_{t=K+2}^T \left( \exp\left(-\frac{2\lambda_{\min}^2(t-K-1)}{\kappa_{\max}^2 \cdot (C_{\max}+1)^2}\right) \exp\left(\frac{4\lambda_{\max} \cdot C_1}{\kappa_{\max}^2 \cdot (C_{\max}+1)^2}\right) \rho_2^K \right) \\
&\leq 2 \cdot \frac{\exp\left(\frac{-2\lambda_{\min}^2}{\kappa_{\max}^2 \cdot (C_{\max}+1)^2}\right)}{1 - \exp\left(\frac{-2\lambda_{\min}^2}{\kappa_{\max}^2 \cdot (C_{\max}+1)^2}\right)} \cdot \exp\left(\frac{4\lambda_{\max} \cdot C_1}{\kappa_{\max}^2 \cdot (C_{\max}+1)^2}\right) \cdot \rho_2^K \\
&= \frac{2}{\exp\left(\frac{2\lambda_{\min}^2}{\kappa_{\max}^2 \cdot (C_{\max}+1)^2}\right) - 1} \cdot \exp\left(\frac{4\lambda_{\max} \cdot C_1}{\kappa_{\max}^2 \cdot (C_{\max}+1)^2}\right) \cdot \rho_2^K \\
&\leq \frac{2}{1 + \frac{2\lambda_{\min}^2}{\kappa_{\max}^2 \cdot (C_{\max}+1)^2} - 1} \cdot \exp\left(\frac{4\lambda_{\max} \cdot C_1}{\kappa_{\max}^2 \cdot (C_{\max}+1)^2}\right) \cdot \rho_2^K \\
&= \frac{\kappa_{\max}^2 \cdot (C_{\max}+1)^2}{\lambda_{\min}^2} \cdot \exp\left(\frac{4\lambda_{\max} \cdot C_1}{\kappa_{\max}^2 \cdot (C_{\max}+1)^2}\right) \cdot \rho_2^K, \tag{EC.22}
\end{aligned}$$

where the last inequality comes from the fact that  $e^x \geq 1+x$  for  $x \geq 0$ .

Therefore, by (EC.20) and (EC.22), (EC.15) is upper bounded by

$$\begin{aligned}
&a_{\max} \cdot M \cdot r_{\max} \cdot \sum_{t=K+2}^T \sum_{j \in [N]} \lambda_j \cdot \mathbb{P}\left(X_{t, s_t^{\text{on}}}^* < a_{\max} + 1 \mid \Theta_t = j\right) \\
&\leq a_{\max} \cdot M \cdot r_{\max} \cdot \sum_{j \in [N]} \lambda_j \left( \left\lceil \frac{C_1}{\lambda_{\min}} \right\rceil \cdot \rho_1^{K-2 \frac{C_1}{\lambda_{\min}}} + \frac{\kappa_{\max}^2 \cdot (C_{\max}+1)^2}{\lambda_{\min}^2} \cdot \exp\left(\frac{4\lambda_{\max} \cdot C_1}{\kappa_{\max}^2 \cdot (C_{\max}+1)^2}\right) \cdot \rho_2^K \right) \\
&\leq a_{\max} \cdot M \cdot r_{\max} \cdot \left( \left\lceil \frac{C_1}{\lambda_{\min}} \right\rceil \cdot \rho_1^{K-2 \frac{C_1}{\lambda_{\min}}} + \frac{\kappa_{\max}^2 \cdot (C_{\max}+1)^2}{\lambda_{\min}^2} \cdot \exp\left(\frac{4\lambda_{\max} \cdot C_1}{\kappa_{\max}^2 \cdot (C_{\max}+1)^2}\right) \cdot \rho_2^K \right) \\
&\leq a_{\max} \cdot M \cdot r_{\max} \cdot \left( \left\lceil \frac{C_1}{\lambda_{\min}} \right\rceil \cdot \rho_1^{-2 \frac{C_1}{\lambda_{\min}}} + \frac{\kappa_{\max}^2 \cdot (C_{\max}+1)^2}{\lambda_{\min}^2} \cdot \exp\left(\frac{4\lambda_{\max} \cdot C_1}{\kappa_{\max}^2 \cdot (C_{\max}+1)^2}\right) \right) \cdot \rho^K,
\end{aligned}$$

where  $\rho = \max\{\rho_1, \rho_2\}$ . The proof of Theorem 2 is completed.  $\square$

### EC.4. Proofs of Theorems 3 and 4 in Section 6

*Proof of Theorem 3.* Recall that the estimated arrival probability of type  $j \in [N]$  in period  $t$  is

$$\hat{\lambda}_{t,j} = \frac{D_j[T, t-K]}{T-t+1+K}.$$

Additionally define the following event:

$$F_{t,j} \triangleq \left\{ \left| \hat{\lambda}_{t,j} - \lambda_j \right| \leq \eta \right\},$$

where  $\eta = \frac{\lambda_{\min}}{3} \min \left\{ \frac{1}{\kappa_{\max}(C_{\max}+1)}, 1 \right\}$  as defined in (26). Let  $F_{t,j}^c$  be the complement set of  $F_{t,j}$ . By Hoeffding's inequality, for all  $j \in [N]$ ,

$$\mathbb{P}(F_{t,j}^c) = \mathbb{P}\left( \left| D_j[T, t-K] - \lambda_j(T-t+1+K) \right| > \eta(T-t+1+K) \right) \leq 2e^{-2\eta^2(T-t+1+K)}. \quad (\text{EC.23})$$

Similar to (21) and (EC.15), we have

$$X_{t,s_t^{\text{on}}} \geq \frac{D_{\Theta_t}[t, t-K] + \hat{\lambda}_{t,\Theta_t}[t-K-1, 1]}{C_{\max} + 1},$$

and

$$\text{REG} \leq a_{\max} \cdot M \cdot r_{\max} \cdot \sum_{t=K+2}^T \sum_{j \in [N]} \lambda_j \cdot \mathbb{P}\left( X_{t,s_t^{\text{on}}}^* < a_{\max} + 1 \mid \Theta_t = j \right). \quad (\text{EC.24})$$

We next bound  $\mathbb{P}\left( X_{t,s_t^{\text{on}}}^* < a_{\max} + 1 \mid \Theta_t = j \right)$ . Similar to (EC.16),

$$\begin{aligned} & \mathbb{P}\left( X_{t,s_t^{\text{on}}}^* < a_{\max} + 1 \mid \Theta_t = j \right) \\ & \leq \mathbb{P}\left( \left| D_{j_t^*}[t-K-1, 1] - \hat{\lambda}_{t,j_t^*}(t-K-1) \right| > \frac{D_j[t-1, t-K] + \hat{\lambda}_{t,j}(t-K-1) - C_1}{\kappa_{\max}(C_{\max} + 1)} \mid \Theta_t = j \right) \\ & \triangleq \mathbb{P}(A) \\ & = \mathbb{P}\left( A, F_{t,j_t^*}^c \right) + \mathbb{P}\left( A, F_{t,j_t^*}, F_{t,j}^c \right) + \mathbb{P}\left( A, F_{t,j_t^*}, F_{t,j} \right) \\ & = \mathbb{P}\left( A, F_{t,j_t^*}^c \right) + \mathbb{P}\left( A, F_{t,j_t^*}, F_{t,j}^c \right) + \mathbb{P}\left( F_{t,j_t^*}, F_{t,j} \right) \cdot \mathbb{P}\left( A \mid F_{t,j_t^*}, F_{t,j} \right) \\ & \leq \mathbb{P}\left( F_{t,j_t^*}^c \right) + \mathbb{P}\left( F_{t,j}^c \right) + \mathbb{P}\left( A \mid F_{t,j_t^*}, F_{t,j} \right), \end{aligned}$$

where  $A$  represents the conditional event

$$\left\{ \left| D_{j_t^*}[t-K-1, 1] - \hat{\lambda}_{t,j_t^*}(t-K-1) \right| > \frac{D_j[t-1, t-K] + \hat{\lambda}_{t,j}(t-K-1) - C_1}{\kappa_{\max}(C_{\max} + 1)} \mid \Theta_t = j \right\}.$$

From (EC.23),

$$\mathbb{P}\left(F_{t,j_t^*}^c\right) \leq 2e^{-2\eta^2(T-t+1+K)}, \quad \mathbb{P}\left(F_{t,j}^c\right) \leq 2e^{-2\eta^2(T-t+1+K)}.$$

In addition, it is straightforward to verify that conditional on  $F_{t,j_t^*}$ ,

$$\begin{aligned} & \left|D_{j_t^*}[t-K-1, 1] - \hat{\lambda}_{t,j_t^*}(t-K-1)\right| \\ & \leq \left|D_{j_t^*}[t-K-1, 1] - \lambda_{j_t^*}(t-K-1)\right| + \left|\left(\hat{\lambda}_{t,j_t^*} - \lambda_{j_t^*}\right)(t-K-1)\right| \\ & \leq \left|D_{j_t^*}[t-K-1, 1] - \lambda_{j_t^*}(t-K-1)\right| + \eta(t-K-1), \end{aligned} \quad (\text{EC.25})$$

and conditional on  $F_{t,j}$ ,

$$\hat{\lambda}_{t,j} \geq \lambda_j - \eta \geq \eta \cdot \kappa_{\max}(C_{\max} + 1) + \frac{\lambda_j}{3}. \quad (\text{EC.26})$$

(EC.25) and (EC.26) together imply that

$$\begin{aligned} & \mathbb{P}\left(A|F_{t,j_t^*}, F_{t,j}\right) \\ & \leq \mathbb{P}\left(\left|D_{j_t^*}[t-K-1, 1] - \lambda_{j_t^*}(t-K-1)\right| > \frac{D_j[t-1, t-K] + \lambda_j(t-K-1)/3 - C_1}{\kappa_{\max}(C_{\max} + 1)}\right). \end{aligned}$$

Moreover, similar to (EC.20) and (EC.22), we can derive

$$\begin{aligned} & \sum_{t=K+2}^T \mathbb{P}\left(\left|D_{j_t^*}[t-K-1, 1] - \lambda_{j_t^*}(t-K-1)\right| > \frac{D_j[t-1, t-K] + \lambda_j(t-K-1)/3 - C_1}{\kappa_{\max}(C_{\max} + 1)}\right) \\ & \leq \left\lceil \frac{3C_1}{\lambda_{\min}} \right\rceil \cdot \hat{\rho}_1^{K-2\frac{C_1}{\lambda_{\min}/3}} + \frac{\kappa_{\max}^2 \cdot (C_{\max} + 1)^2}{(\lambda_{\min}/3)^2} \cdot \exp\left(\frac{4 \cdot (\lambda_{\max}/3) \cdot C_1}{\kappa_{\max}^2 \cdot (C_{\max} + 1)^2}\right) \cdot \hat{\rho}_2^K, \end{aligned}$$

where  $\hat{\rho}_1$  and  $\hat{\rho}_2$  are defined in (26). Combining all the above, (EC.24) is upper bounded by

$$\begin{aligned} & a_{\max} \cdot M \cdot r_{\max} \cdot \sum_{t=K+2}^T \sum_{j \in [N]} \lambda_j \cdot \mathbb{P}\left(X_{t,s_t^{\text{on}}}^* < a_{\max} + 1 | \Theta_t = j\right) \\ & \leq a_{\max} \cdot M \cdot r_{\max} \cdot \sum_{t=K+2}^T 4e^{-2\eta^2(T-t+1+K)} \\ & \quad + a_{\max} \cdot M \cdot r_{\max} \cdot \left(\left\lceil \frac{3C_1}{\lambda_{\min}} \right\rceil \cdot \hat{\rho}_1^{K-2\frac{C_1}{\lambda_{\min}/3}} + \frac{\kappa_{\max}^2 \cdot (C_{\max} + 1)^2}{(\lambda_{\min}/3)^2} \cdot \exp\left(\frac{4 \cdot (\lambda_{\max}/3) \cdot C_1}{\kappa_{\max}^2 \cdot (C_{\max} + 1)^2}\right) \cdot \hat{\rho}_2^K\right) \\ & \leq a_{\max} \cdot M \cdot r_{\max} \cdot \left(\frac{2}{\eta^2} + \left\lceil \frac{3C_1}{\lambda_{\min}} \right\rceil \cdot \hat{\rho}_1^{-2\frac{C_1}{\lambda_{\min}/3}} + \frac{\kappa_{\max}^2 \cdot (C_{\max} + 1)^2}{(\lambda_{\min}/3)^2} \cdot \exp\left(\frac{4 \cdot (\lambda_{\max}/3) \cdot C_1}{\kappa_{\max}^2 \cdot (C_{\max} + 1)^2}\right)\right) \cdot \hat{\rho}_3^K, \end{aligned}$$

where the last inequality comes from the fact that

$$\sum_{t=K+2}^T 4e^{-2\eta^2(T-t+1+K)} \leq 4e^{-2\eta^2 K} \frac{e^{-2\eta^2}}{1 - e^{-2\eta^2}} \leq \frac{2}{\eta^2} \cdot \hat{\rho}_3^K.$$

The proof of Theorem 3 is completed.  $\square$

*Proof of Theorem 4.* As discussed in Section 6.3,  $T = (K + 1)(\lceil T/(K + 1) \rceil - 1) + R$  and there are  $\lceil T/(K + 1) \rceil$  batches. It suffices to consider the regret incurred in the first  $\lceil T/(K + 1) \rceil - 1$  batches. Particularly, the  $n$ -th batch consists of  $\Theta_{T-(n-1)(K+1)}, \Theta_{T-(n-1)(K+1)-1}, \dots, \Theta_{T-n(K+1)+1}$  for  $n = 1, \dots, \lceil T/(K + 1) \rceil - 1$ , and the decision for  $\Theta_{T-(n-1)(K+1)-(K-m)}$  in the  $n$ -th batch is equivalent to  $m$ -period delay based on the expected demand  $\lambda[T - n(K + 1), 1]$  for  $m = K, K - 1, \dots, 0$ . Each arrival in the first  $\lceil T/(K + 1) \rceil - 1$  batches can be specified by some  $n \in [\lceil T/(K + 1) \rceil - 1]$  and  $m \in \{0\} \cup [K]$ :

$$\begin{aligned} t = t(n, m) &\triangleq T - (n - 1)(K + 1) - (K - m) \\ &= (K + 1)(\lceil T/(K + 1) \rceil - 1 - n) + (m + 1) + R. \end{aligned} \tag{EC.27}$$

Namely, the arrival at time  $t(n, m)$  is in the  $n$ -th batch with  $m$ -period delay.

By the characterization of  $(n, m)$  and (EC.15), we have

$$\text{REG} \leq a_{\max} \cdot M \cdot r_{\max} \cdot \sum_{n=1}^{\lceil T/(K+1) \rceil - 1} \sum_{m=0}^K \sum_{j \in [N]} \lambda_j \cdot \mathbb{P} \left( X_{t(n,m), s_{t(n,m)}^{\text{on}}}^* < a_{\max} + 1 \mid \Theta_{t(n,m)} = j \right).$$

Similar to (EC.16),  $\mathbb{P} \left( X_{t(n,m), s_{t(n,m)}^{\text{on}}}^* < a_{\max} + 1 \mid \Theta_{t(n,m)} = j \right)$  can be bounded by

$$\mathbb{P} \left( X_{t(n,m), s_{t(n,m)}^{\text{on}}}^* < a_{\max} + 1 \mid \Theta_{t(n,m)} = j \right) \leq \mathbb{P} \left( E_{t(n,m)}^j \right),$$

where  $E_{t(n,m)}^j$  represents the following event conditional on  $\Theta_{t(n,m)} = j$ :

$$\begin{aligned} &\left| D_{j_{t(n,m)}^*} [T - n(K + 1), 1] - \lambda_{j_{t(n,m)}^*} (T - n(K + 1)) \right| \\ &> \frac{D_j [t(n, m) - 1, t(n, m) - m] + \lambda_j (T - n(K + 1)) - C_1}{\kappa_{\max} (C_{\max} + 1)}. \end{aligned}$$

Here,  $j_{t(n,m)}^* \in \arg \max_{j \in [N]} \{|D_j [T - n(K + 1), 1] - \lambda_j (T - n(K + 1))|\}$  and  $t(n, m) - m - 1 = T - n(K + 1)$  from (EC.27). Similar to (EC.17), define

$$\mathbb{P} \left( E_{t(n,m)}^j \mid \Theta_{t(n,m)-1}, \dots, \Theta_{t(n,m)-m} \right) = A_{t(n,m)}^{j,1} + A_{t(n,m)}^{j,2},$$

where

$$\begin{aligned} A_{t(n,m)}^{j,1} &\triangleq \mathbb{I} (D_j [t(n, m) - 1, t(n, m) - m] + \lambda_j (T - n(K + 1)) - C_1 < 0) \\ &\quad \cdot \mathbb{P} \left( E_{t(n,m)}^j \mid D_j [t(n, m) - 1, t(n, m) - m] + \lambda_j (T - n(K + 1)) - C_1 < 0 \right), \\ A_{t(n,m)}^{j,2} &\triangleq \mathbb{I} (D_j [t(n, m) - 1, t(n, m) - m] + \lambda_j (T - n(K + 1)) - C_1 \geq 0) \\ &\quad \cdot \mathbb{P} \left( E_{t(n,m)}^j \mid D_j [t(n, m) - 1, t(n, m) - m] + \lambda_j (T - n(K + 1)) - C_1 \geq 0 \right). \end{aligned}$$

It is easy to see  $\mathbb{P}\left(E_{t(n,m)}^j \mid D_j[t(n,m) - 1, t(n,m) - m] + \lambda_j(T - n(K+1)) - C_1 < 0\right) = 1$ .

It implies that

$$\begin{aligned}
& \sum_{n=1}^{\lceil T/(K+1) \rceil - 1} \sum_{m=0}^K \mathbb{E} \left[ A_{t(n,m)}^{j,1} \right] \\
&= \sum_{n=1}^{\lceil T/(K+1) \rceil - 1} \sum_{m=0}^K \mathbb{P}(D_j[t(n,m) - 1, t(n,m) - m] + \lambda_j(T - n(K+1)) - C_1 < 0) \cdot 1 \\
&= \sum_{m=0}^K \sum_{n=1}^{\lceil T/(K+1) \rceil - 1} \mathbb{P}(\text{Bin}(m, \lambda_j) < C_1 - \lambda_j(T - n(K+1))) \\
&= \sum_{m=0}^K \sum_{n=0}^{\lceil T/(K+1) \rceil - 2} \mathbb{P}(\text{Bin}(m, \lambda_j) < C_1 - \lambda_j(n(K+1) + R)) \\
&\leq \sum_{m=0}^K \min \left\{ \left\lceil \frac{T}{K+1} \right\rceil - 1, \left\lceil \frac{C_1}{\lambda_{\min}(K+1)} \right\rceil \right\} \mathbb{P}(\text{Bin}(m, \lambda_j) < C_1 - \lambda_j R),
\end{aligned}$$

where the last equality comes from the expression of  $T = (K+1)(\lceil T/(K+1) \rceil - 1) + R$  and the last inequality is similar to (EC.18). Thus, by applying Hoeffding's inequality and using a similar argument to (EC.19),

$$\sum_{n=1}^{\lceil T/(K+1) \rceil - 1} \sum_{m=0}^K \mathbb{E} \left[ A_{t(n,m)}^{j,1} \right] \leq \min \left\{ \left\lceil \frac{T}{K+1} \right\rceil - 1, \left\lceil \frac{C_1}{\lambda_{\min}(K+1)} \right\rceil \right\} \sum_{m=0}^K \rho_1^{m+2R-2\frac{C_1}{\lambda_{\min}}}, \tag{EC.28}$$

where  $\rho_1 = \exp(-2\lambda_{\min}^2)$ .

Next, we bound  $\sum_{n=1}^{\lceil T/(K+1) \rceil - 1} \sum_{m=0}^K \mathbb{E} \left[ A_{t(n,m)}^{j,2} \right]$  from above: by Hoeffding's inequality,

$$\begin{aligned}
& \mathbb{P}\left(E_{t(n,m)}^j \mid D_j[t(n,m) - 1, t(n,m) - m] + \lambda_j(T - n(K+1)) - C_1 \geq 0\right) \\
&\leq 2 \exp \left( -2 \frac{[D_j[t(n,m) - 1, t(n,m) - m] + \lambda_j(T - n(K+1)) - C_1]^2}{(T - n(K+1)) \cdot \kappa_{\max}^2 \cdot (C_{\max} + 1)^2} \right),
\end{aligned}$$

which implies

$$\mathbb{E} \left[ A_{t(n,m)}^{j,2} \right] \leq 2 \mathbb{E} \left[ \exp \left( -2 \frac{[D_j[t(n,m) - 1, t(n,m) - m] + \lambda_j(T - n(K+1)) - C_1]^2}{(T - n(K+1)) \cdot \kappa_{\max}^2 \cdot (C_{\max} + 1)^2} \right) \right].$$

In addition, similar to (EC.21),

$$\begin{aligned}
& \mathbb{E} \left[ \exp \left( -2 \frac{[D_j[t(n,m) - 1, t(n,m) - m] + \lambda_j(T - n(K+1)) - C_1]^2}{(T - n(K+1)) \cdot \kappa_{\max}^2 \cdot (C_{\max} + 1)^2} \right) \right] \\
&\leq \exp \left( -\frac{2\lambda_{\min}^2(T - n(K+1))}{\kappa_{\max}^2 \cdot (C_{\max} + 1)^2} \right) \exp \left( \frac{4\lambda_{\max} \cdot C_1}{\kappa_{\max}^2 \cdot (C_{\max} + 1)^2} \right) \rho_2^m,
\end{aligned}$$

where  $\rho_2 = \lambda_{\min} \exp\left(-\frac{4\lambda_{\min}}{\kappa_{\max}^2(C_{\max}+1)^2}\right) + (1 - \lambda_{\min})$ . Thus, we have

$$\begin{aligned}
& \sum_{n=1}^{\lceil T/(K+1) \rceil - 1} \mathbb{E} \left[ A_{t(n,m)}^{j,2} \right] \\
& \leq 2 \sum_{n=1}^{\lceil T/(K+1) \rceil - 1} \left( \exp\left(-\frac{2\lambda_{\min}^2(T - n(K+1))}{\kappa_{\max}^2 \cdot (C_{\max} + 1)^2}\right) \exp\left(\frac{4\lambda_{\max} \cdot C_1}{\kappa_{\max}^2 \cdot (C_{\max} + 1)^2}\right) \rho_2^m \right) \\
& = 2 \left( \sum_{n=0}^{\lceil T/(K+1) \rceil - 2} \exp\left(-\frac{2\lambda_{\min}^2(n(K+1) + R)}{\kappa_{\max}^2 \cdot (C_{\max} + 1)^2}\right) \right) \exp\left(\frac{4\lambda_{\max} \cdot C_1}{\kappa_{\max}^2 \cdot (C_{\max} + 1)^2}\right) \rho_2^m \\
& = \frac{2 \left(1 - \exp\left(-\frac{2\lambda_{\min}^2(K+1)}{\kappa_{\max}^2 \cdot (C_{\max} + 1)^2} (\lceil \frac{T}{K+1} \rceil - 1)\right)\right) \exp\left(-\frac{2\lambda_{\min}^2}{\kappa_{\max}^2 \cdot (C_{\max} + 1)^2} R\right)}{1 - \exp\left(-\frac{2\lambda_{\min}^2}{\kappa_{\max}^2 \cdot (C_{\max} + 1)^2} (K+1)\right)} \cdot \exp\left(\frac{4\lambda_{\max} \cdot C_1}{\kappa_{\max}^2 \cdot (C_{\max} + 1)^2}\right) \cdot \rho_2^m \\
& \leq \frac{2 \left(1 - \exp\left(-\frac{2\lambda_{\min}^2(K+1)}{\kappa_{\max}^2 \cdot (C_{\max} + 1)^2} (\lceil \frac{T}{K+1} \rceil - 1)\right)\right)}{1 - \exp\left(-\frac{2\lambda_{\min}^2}{\kappa_{\max}^2 \cdot (C_{\max} + 1)^2}\right)} \cdot \exp\left(\frac{4\lambda_{\max} \cdot C_1}{\kappa_{\max}^2 \cdot (C_{\max} + 1)^2}\right) \cdot \rho_3^R \cdot \rho_2^m \\
& = \frac{2 \left(1 - \rho_3^{(K+1)(\lceil \frac{T}{K+1} \rceil - 1)}\right)}{1 - \rho_3} \cdot \exp\left(\frac{4\lambda_{\max} \cdot C_1}{\kappa_{\max}^2 \cdot (C_{\max} + 1)^2}\right) \cdot \rho_3^R \cdot \rho_2^m, \tag{EC.29}
\end{aligned}$$

where  $\rho_3 = \exp\left(-\frac{2\lambda_{\min}^2}{\kappa_{\max}^2 \cdot (C_{\max} + 1)^2}\right)$ .

Therefore, by combining (EC.28) and (EC.29), we conclude that

$$\begin{aligned}
& \sum_{n=1}^{\lceil T/(K+1) \rceil - 1} \sum_{m=0}^K \sum_{j \in [N]} \lambda_j \cdot \mathbb{P} \left( X_{t(n,m),s_t(n,m)}^* < a_{\max} + 1 \mid \Theta_{t(n,m)} = j \right) \\
& \leq \min \left\{ \left\lceil \frac{T}{K+1} \right\rceil - 1, \left\lceil \frac{C_1}{\lambda_{\min}(K+1)} \right\rceil \right\} \cdot \sum_{m=0}^K \rho_1^{m-2} \frac{c_1}{\lambda_{\min}} \cdot \rho_1^{2R} \\
& \quad + \frac{2 \left(1 - \rho_3^{(K+1)(\lceil \frac{T}{K+1} \rceil - 1)}\right)}{1 - \rho_3} \cdot \exp\left(\frac{4\lambda_{\max} \cdot C_1}{\kappa_{\max}^2 \cdot (C_{\max} + 1)^2}\right) \cdot \sum_{m=0}^K \rho_2^m \cdot \rho_3^R \\
& \leq \left( c_1 \cdot \sum_{m=0}^K \rho_1^{m-2} \frac{c_1}{\lambda_{\min}} + \frac{2c_2 \cdot \exp\left(\frac{4\lambda_{\max} \cdot C_1}{\kappa_{\max}^2 \cdot (C_{\max} + 1)^2}\right)}{1 - \rho_3} \cdot \sum_{m=0}^K \rho_2^m \right) \cdot \rho^R,
\end{aligned}$$

where  $c_1 = \min \left\{ \left\lceil \frac{T}{K+1} \right\rceil - 1, \left\lceil \frac{C_1}{\lambda_{\min}(K+1)} \right\rceil \right\}$ ,  $c_2 = 1 - \rho_3^{(K+1)(\lceil \frac{T}{K+1} \rceil - 1)}$  and  $\rho = \max\{\rho_1^2, \rho_3\}$ .

The proof of Theorem 4 is completed.  $\square$
